# Supplementary material for: Circulating glucose levels modulate neural control of desire for high-calorie foods in humans
Source: JCI journal article supplement (doi:10.1172/jci57873), 2011-09-19
Supplement: sd1 [file 1]

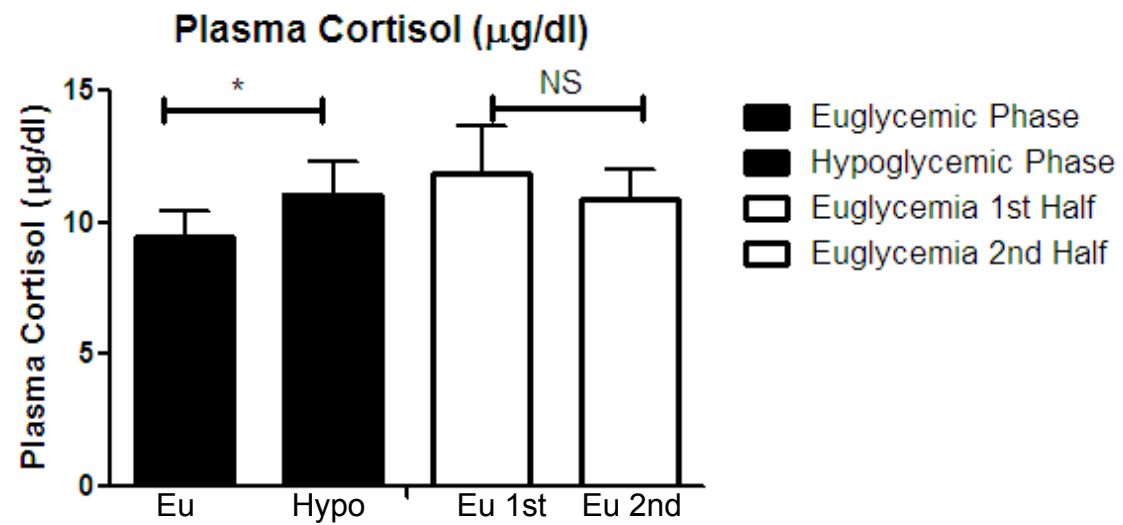

**Supplemental Figure 1. Plasma Cortisol Levels.** Mean ( $\pm$  SEM) plasma cortisol (mg/dl) levels during the euglycemic and hypoglycemic phases of the stepped clamp study (black bars) and the first and second half of the euglycemic control study (white bars) \* $p=0.003$ .

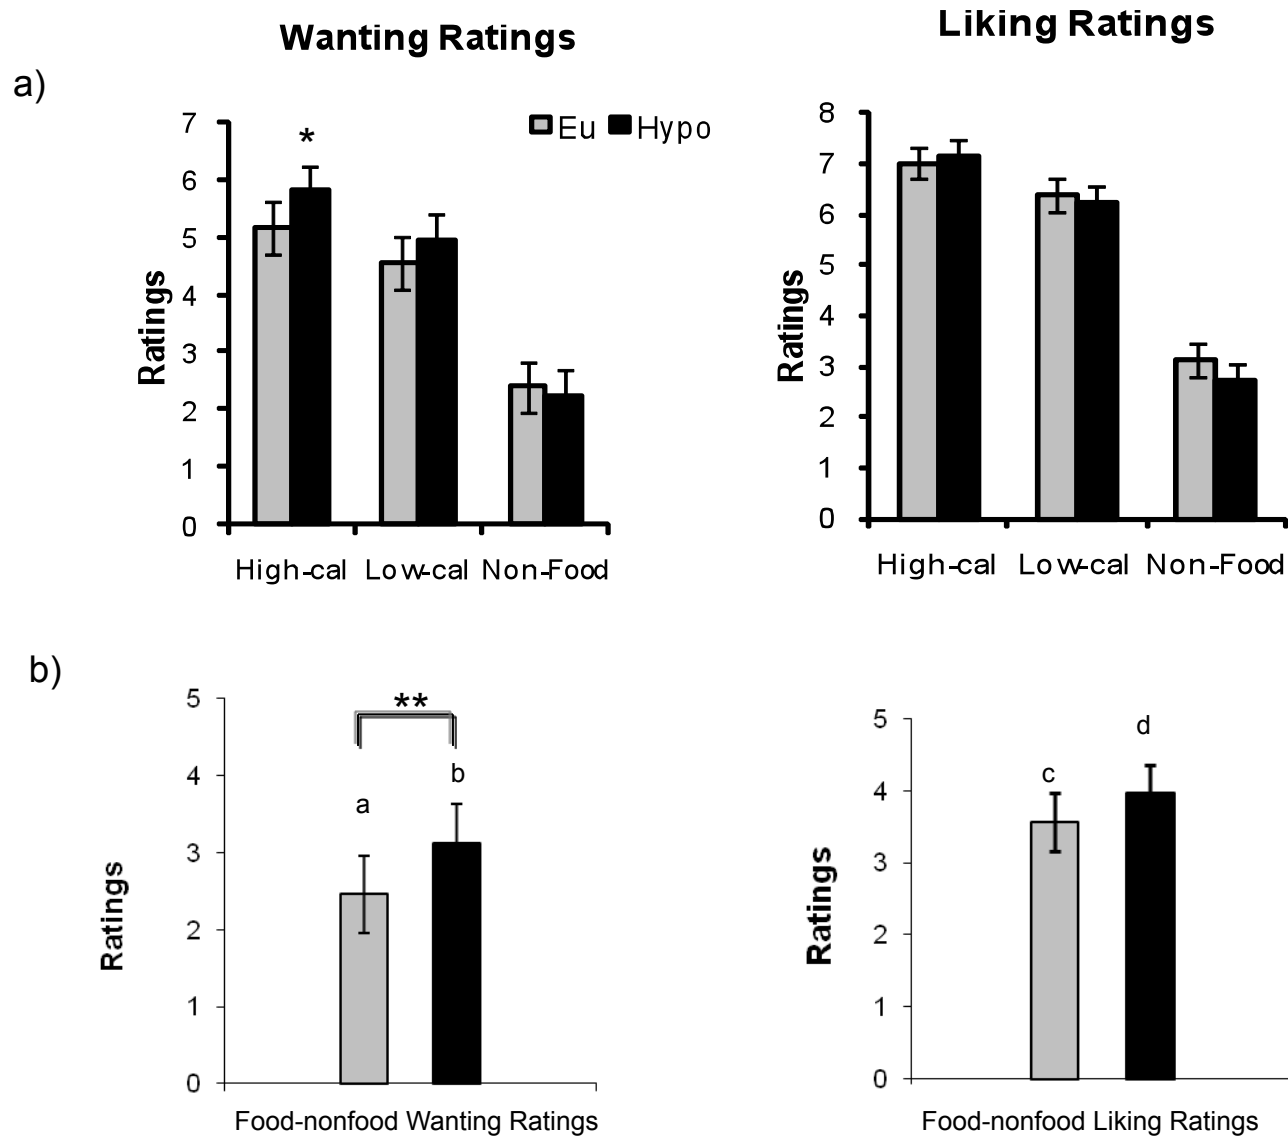

**Supplemental Figure 2.** Behavioral effects of high and low calorie foods under Eu and Hypo. a) Wanting and Liking ratings for high-calorie (high-cal), low-calorie (low-cal), and non-food items during euglycemia (Eu) (grey columns) and hypoglycemia (Hypo) (black columns); \* $p < 0.05$ , Hypo>Eu; bonferonni corrected; b) Wanting and Liking ratings for food compared to nonfood items under Eu (grey columns) and Hypo (black columns), <sup>a</sup>  $p < 0.001$ , food>nonfood; <sup>b</sup>  $p < 0.001$ , food>non-food; <sup>\*\*</sup>  $p = 0.009$ , Hypo>Eu; <sup>c</sup>  $p < 0.001$ , food>nonfood <sup>d</sup>  $p < 0.001$ , food>nonfood.

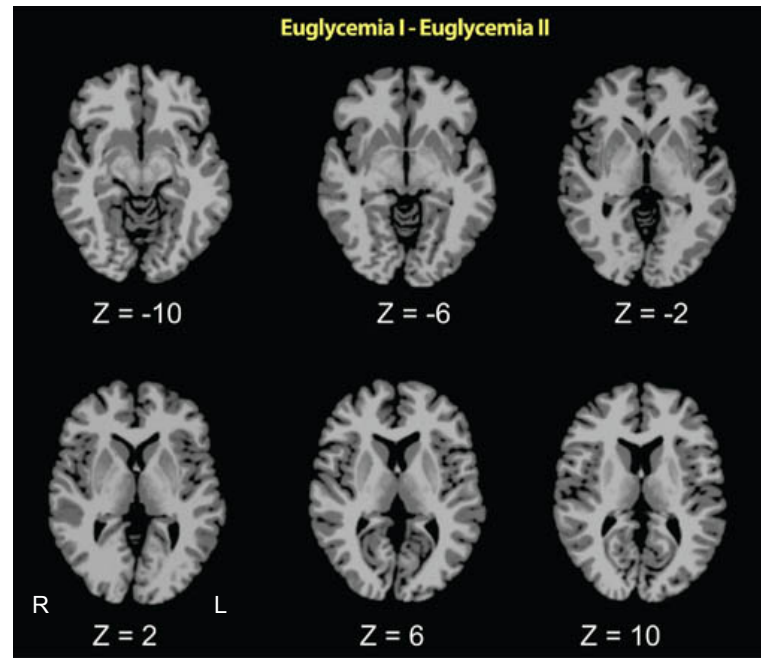

**Supplemental Figure 3. Euglycemic Control Study.** Euglycemic control study (n=7) showing no difference in brain responses to food images during the first half vs last half of study session. L=left; R=right
